# Supplementary material for: Molecular sexual determinants in Pistacia genus by KASP assay
Source: Research Square preprint supplement (doi:10.21203/rs.3.rs-499676/v1), 2021-05-17
Supplement: Supplementary file 1 [file 66530fa1cb993b650217e2e3.docx]

**Appendix 1** Four hot region after de novo assembly.

| **SNP-PIS-133396** |
| --- |
| GAAATGAAATATTGCACATTTTTCAATATAATACAAACAATAAAAATGGAAAAAAATTAAAAAATGAAAACATTAATGAATAGGCCATTTAACCACCACTAGGTGGTTCAGCGGTCAACTAGGACTCTTTGGTGTATTATTCAAGCAATCATGAGTTCAATCCATCTAGGTTGTTAATAGGGATGGCCAGTGAGAGGATTTATCCGTTAACTTCAGGGTCCTAAGGAATTAGTTAAGGTACGCACAAACAAGGTCAGACACCCAGGTCATCAAAAAAAAAAAAAAAAAAANNNGAAAGTGCTCAATTTATTTACCATATGTTCTATGAACATGCCATGGTTCTATATGAGAATTCTCCTCTGTTTTTTGGGCAAACCGCAAAGAAGATTAAAGTAGCTGATCCATGATCTTCAAGTTTCAGTACTATTCATACATATAAATGATGAAATGGGAATTATTCCAAGCTCAATTTTCATGATGTTTTTGTAGCTATTTTGGCATATAGCAGGACCACCAGCTTCTTTTATNGCCTATTACGTTATCAGGACTCTCACTGCCATGGTTGGTGAAATCAGCATCAATTGCCTAGCTCTTGCTTACGTGGTAATTAATCACATTATAATCATCTTAATCTTTTCTAATTAATTAGGATAATATTTCATACATAACCAGTTGTCATGTTAATTTCTCAGGCAGATAACATCCCAGAAGGANCAACGGGCATCAGCATTCGGAATTTTATCTGGTGTAGGTACCGGCGCCTCCTTTGTCTGTGGAACCTTGGCCACTCGTTTCCTCTCCACAACTTCCACATTCCGGGTTGCTACATACATTATTTGGAATTTATATTTGCTGCCTCTGTTATATTTTATTGCATGGTTTTGACATATATNTTTGTGTTTCCTTTGCAGGTTGCTACATTATTCTCCATGATTGCAGCTGTGTACATGAGAGTTTTTCTCAAGGAGAGTTTACGCCCTGATGAGGATGGNNNNNNNNNNNNNNNACAAGCTTCATTACTGGTATACCTTTTAATGCATAATTTTCTATATGAATGTACACCAAATTCTATTATAATTACTAACTTTTAAGATCTTATCTCATGTAGTACTTCTTAAAGGCTCAATTTCACTTCAACAAAAACCAGTTTGCTGATCTGATGCTAATTCTTGGGGTTGCAGGAATGGTTTCACAGGCATGTCTTATCTAACTCTGTGTCCCCATGCATATTCTGTTTTTCATTTACTAAATTCGAATTCTTTGGAATCCTGCAGCTC |
| **SNP-PIS-136404** |
| GGGCAATGAGTTCTTGAGGAAGAGGATGAAACCGAGTTCAAAATCTGAGATTAGTCCTGGTACAATGAGGAGGATTAAAAGGTTTGGCTTTTATATTTTTTACATCATGCTTGATGGTTTCTTTGAATAGTACTTCTTTGTGCATTTTTTATTCATTCCCATTTGTAGGTCCTAATTTTGTGTGTCAGTGAAATGTAGAATACAGGTGATTTTGGCTTCTAATATTTGTTACGAACCTATGTAGGGTTAAGAAGGTGACAAAGATGTCCAAGAAAGCCACTACTGGAATTCTTTTAGGGGTTGTCAAAGNCGGATTCCTCACAAATTCAATTGCCAACTCTAAAGCTGGCAAGAAATTCTTTAGCATTCTGCCTGGAGAAGTTGTCCTTGCTAGTTTGGACGGATTTNACTGCCTTGGCTTATATATCCTTAATCAGCTTTGAAGTATATTTTACTTATGTAGTTATAGTATGTGCTATATCTTGTAGCTTTAAGATTTGTTATGCTCTGTACTTGCTGCTCATGTTATTGTTCATTCTATGTACAGAGAAAGTTATTAATGCAGTTGAGGTTAGCGGTAAGAATGTTATGTCAACTACATCAGTAGTAACTACTGGGCTTGTTTCAGAGAGGTATATCTTTAATCTCAATCTAACAACATAATTGATGCTTCATTATGCCATCACCACTTTGATGTAACAATATAATTGATGCTTCATTGTTTCATAAACTTTTGAACTAATATTTTTTCTGAACACGATTTTCATCCTATTTCATGTATGTTATTTTTCATTGGCTGGTTTAATCATATTGTTTCTCATTTCAGGTATGGGGAGGAAGCAGCAAAGGCAACCAATGAAGGGCTACATGCAGCCGGCAATGTAATTGGCTCTGCTTGGACCATTTTTAAGATTAAAAAGGCAGTCAATCCAGTGACCATGTTGAAACCCACAATCCTTGCAAAAGCTACTGGGAAAGCAAATTATGTCGAATTGAAGGCAAAACAACATAAATAATTGCAACTCATAGATTTTTATTTTGGGNNNNNNNNNNNNNNNNNNNNNNNNNNNNNNNNNNNNNNNNNNNNNNNNNNNNNNNNNNTTTTTTTTTTTTTTTTTTTTATCTCTTAATGCTGGAGCTTTTGTCTTTAATTTGGCAACAATTTGTAGATGCAGACATGCAATTCTATTTGTTTTTTCTTTTCATGAAGAAAAATGTNAGACCCATACAAAGAGGGCTACAAAGTGACATCGGCAAGAAGATAAAAAAAAAGAAAAACGGAAAAAGAGAGAGAGAGAGAGAAATCATGAAAATCAAGGATAGGAATTGTC |
| **SNP-PIS-167992** |
| TCAATAAAAAATTATCAAGCAAAACAAAAAACTAACGTGACTTAAAGGACAACAGCTCATAACCAGTAACAGCACCAACATATTTCTATTGCTATTTCTTCTTAATAAGAAACANCATTGCTATTGATAACTTACCAACATAAAAGATTATGAGCATACACAAAATACACATGCATGGAAAAAGCGGCATATTTCCCCATGCATTCTAGAGCTACACAGAGACTGCATTCAAAGTTGAATGGGACCACTGAACAAAATTGGTGATGCCTCCAAAATTAAGGGAATCTGNNNNNNACCATAAGTTCAACTTTTAATCATTTGGCATCTTAACAGCCAGTGCTTCAGAAATGGATCCATTCAGATGAATTANTGGAGCAATACAATCAGATGGGACAACCAAACATATCTTAGGACACATTTATAACCAANGACATGAAATTCACAATCTGAGGAGGACAGTGACTCTTGATTTTGAGAGTCATTTCCAGAAACTTTAGGCAGTGGTGATTGGATTCTTCTACTCATGATTGCTGCTGGTTCATTTNNNNNNNNNNNNNNNNNGAATAGGTAGAAACATGGAACAATTTTCAATCCTGTTTGTCAAATGTTACCATTAATATCNAGAAAAAGAAAAGAAACATATCATATTCGAAACAAAAAAGAAAGAGAACTAAATATTACATAAAACAAAAGGAAAGAGAGCTAACTACTGCACAATAGAAATAAATGTTTCTTGAAAATCTAAAGCACAAATAACAAATGAAACACTACAATTTTACTTCAAGCAAGGATTTAAATGCTTGGATACAACATTAATAATAATAATCAATAAGTATATGCATATGCGAGCAACCAAAAAAAAAAAAAAGTAACAGTATTCAAAGTTCCACACAGAAGAGGAAGANNNNNNNNNNNNNNTAAGGGCTTGAAAAGGAATTCAAACGAAAAATAACTTCATAGCGTGAGCTCTTTGTTGTTCCACCTGTAACCGCAACCCTAAGCTGCAATTGATCACTTCCAGTATCTGATTTTAATGAAATGCGCATAGCACCTTCA |
| **SNP-PIS-174431** |
| CCTCTCCTTTTCTCTTTCCCTAAGCTCCTGCTCCCGAATCCTCTCTCTTTCATCCTGGTCGCTTCGGTGCCGTTCTGGCCGACTCCCACTTCGACGTGACTGCTCTCTCTCCTTCTCCTTATCCCTTTCCCTCTCTCTTTCACCGTCACGTTCCCGCTCTCTTCTGTCTTTGTCATGATCACGTTCCCGCTCTCTTCTGTCTTTGTCATGATCACGTTCCCGATCCCTATCTCTTTCCTTATCCCTCCCATTCCTCTCTTCTCTATCCCTATCCTTATCTCTCTCTCTATCCTTATGTTCCCGGCTACTCTTGTGTCTATCACTCACTCCATCTCTAGACCTTGAGCGATTACGGGATGAGCCCCTTTCTTTCCTTCTATCATGATCACGTATATCATCTCTAGATTTGAAGGCCTTCAAGCGACGCGCATCATCATCATGATCTTCATCCTTCTCATCACTCCTATGCTTTGAACTCCTACTCCGTTCTCTCTCTTCAGACTTCCTAGCTCCACCACCACCATTTTCCTTTGCCTTCCCTTTCGAAGGCTCAGGATTCTCAACCGTTTTCTCCAAGTATTCGTACTCATCAAAATCCATTTTGCTCCTTTTTAACCAAACAACCCACCGAACACCTTGGCTGATAAACTACACCTACCACCGCAGAAACCTTAAAAAAAAATTAAAAAATAAATAAATTAACATTTCTCAAGCAAATATTAAAACAGCTCCTCTGTTTCCTAAAAATCAAACACANNNNNNNNNNNNNNNNNNNNNNNNNNNNNNNNNNNNNNNNNNNNNNNNNNNNNNNNNNNNNNNNNNNNNNNNNNNNNNNNNNNTATAAAGAGTGAATTCCATTACTTCAACAAGTCTCTAGCCGCGTACATATAAAAATTAACTACTCACAGTGAAAGTGGACAAATTGTTAAGTTAAAACAAATGCATGTTCTGATTACAAATTTATAATATTCGATTCANNNNNNNNNNNNNNNNNNNNNNNNNNNNNNNNNNNNNNNNNNNNNNNNNNNNNNNNNNNNNNNNNNNNNNNNNNNNNNNNNAACAAAGAAATAAAAACAAGTAAAAACATCACCAGGCTTTGAGTTTCGTTTATAGTTTAATTACACTGACCTAGAGATTGTGATTGGCAGCAGAGAAGAAGAAGCTTAAAAACGAGTCAAAACGANNNNNNNNNNNNNNNNNNNNNNNNNNNNNNNNNNNNNNNNNNNNNNNNNNNNNNNNNNNNNNNNNNNNNNNNNNNNNNNNNNNCGGAGAATATGAGCTCAAATGTGTTTAAAACGCGAGGATTTAGAGGAAGTCCGGGACTCCTCTCTCTCTCTCTCTCTCACTGGATCTTTCGCTAGGGTAGCAAGAGTGAAAAGA |

**Note:** In Table S1, red letter emphasis SNP positions for each region and yellow text emphasis sequence around these SNPs and used to find the location of the polymorphism. Yellow labelled sequences are given by Kafakas et al. (2015). Blue labelled texts emphasise the defined primers to use for Sanger sequence.

**Appendix 2** Alignment results of each *Pistacia* species.

| >Nucleotide_alignment_167992_(vera)_consensus_sequence Alignment of 4 sequences: P.vera_female.167992.PCR.F.ab1 (reversed), P.vera_female.167992.PCR.R.ab1, P.vera_male.167992.PCR.F.ab1 (reversed), P.vera_male.167992.PCR.R.ab1 |
| --- |
| ACMCATAKAGTATCTCTGGATTGCGGGGTGTTKRCYCGGGTCTTGCCGMYMWAKKCMCTTYKCMGTWRTTSAGTCACAATACACCKASMAGRMMAATTACGRARAATTWTCCKGSMTYTYTTWMATWATWRAWAAKSSTARAGARAMWGATTMGMMSRGSMGYCMAGYTRSWKWMACTAACMCGGAACTTCTYAAKASTKYWWATSTGGGTYCRSMCTAGAKKCTSGAWRMATAKRTASTCAYCTWCMCGRWKGAKAAACTCAGGGARRAAWWCARAYMKYGSAKMATSSATKAYSCRMKRTCTGWWWKCYKCMTAAGCTGTCTSHWCCGCGTAGGYTSAATMTAKKYWTYCAGAMTSTAGWBBGWAMACMGATTTBACGTYATAAKNADGACCWGGTWMKGAAACTCAGMWBKACTCMYCTGTGTATCHTTTTTCTMGSCWYATYWAGAATSAGRRRRAACMCRKKAAACACHNCNGAACKSMMTTTWAAATCAGATACTGGAAGTGATCAATTGCAGCTTAGGGTTGCGGTTAGAGGTGGAACAAAGAGCTCACGCTATGAAGTTATTTTTCGTTTGAATTCCTTTTCAAGCCCTTACAGGTTATATTGTAAAGCCATATACATACAAGTTTTCATGTCTCTTCCTCTTCTGTGTGGAACTWWYGAKCKYKAM |
| >Nucleotide_alignment_167992_(terebinthus)_consensus_sequence Alignment of 4 sequences: P.terebinthus_female.167992.PCR.F.ab1, P.terebinthus_female.167992.PCR.R.ab1 (reversed), P.terebinthus_male.167992.PCR.F.ab1, P.terebinthus_male.167992.PCR.R.ab1 (reversed) |
| KWAYASHYYAWAGTTCCACACAGAAGAGGAAGAGACATGAAAACTTGTATGTATATGGCTTTACAGTATCACCTGTAAGGGCTTGAAAAGGAATTCAAACGAAAAATAACTTCATAGCGTGAGCTCTTTGTTCCACCTCTAACCGCAACCCTAAGCTGCAATTGATCACTTCCAGTATCTGATTTTAAAKYSRMA |
| >Nucleotide_alignment_167992_(mutica)_consensus_sequence Alignment of 4 sequences: P.mutica_male.167992.PCR.R.ab1 (reversed), P.mutica_male.167992.PCR.F.ab1, P.mutica_female.167992.PCR.R.ab1 (reversed), P.mutica_female.167992.PCR.F.ab1 |
| CMYKASTCAWWGTTCCACACAGAAGAGGAAGAGACATGAAAACTTGTATGTATATGGCTTTACAATATAACCTGTAAGGGCTTGAAAAGGAATTCAAACGAAAAATAACTTCATAGCGTGAGCTCTTTGTTCCACCTCTAACCGCAACCCTAAGCTGCAATTGATCACTTCCAGTATCTGATTTWAAARCKGTTAACTTACYYWTTTWWGTGGKKTGGGMYCMMKGSCCYTYTTYCARRRARGRAAACTGGCCTGGCCGCTKSAWTWAAGRAACC |
| >Nucleotide_alignment_167992_(khinjuk)_consensus_sequence Alignment of 4 sequences: P.khinjuk_female.167992.PCR.F.ab1 (reversed), P.khinjuk_female.167992.PCR.R.ab1, P.khinjuk_male.167992.PCR.F.ab1 (reversed), P.khinjuk_male.167992.PCR.R.ab1 |
| TKGGSTTTTTTAAAATCAGATACTGGAAGTGATCAATTGCAGCTTAGGGTTGCGGTTAGAGGTGGAACAAAGAGCTCACGCTATGAAGTTATTTTTCGTTTGAATTCCTTTTCAAGCCCTTACAGGTNATAYTGTAAAGCCATATACATACAAGTTTTCATGTCTCTTCCTCTTCTGTGTGGAAMWTWHGAKKCRC |
| >Nucleotide_alignment_133396_(vera)_consensus_sequence Alignment of 4 sequences: P.vera_female.133396.PCR2.F.ab1, P.vera_female.133396.PCR2.R.ab1 (reversed), P.vera_male.133396.PCR2.F.ab1, P.vera_male.133396.PCR2.R.ab1 (reversed) |
| GAAACGRSTGCCCAAGGTTCCCACAAAAAARGAGGGCGCGGTACCTCACANCCAGATAAAATTCCGAAAWGCTGATGCCCGTTGTGCCTTCTGGGAWGTAATCCGCCYGACAAATNAACCAGACCAACGKWMCGKAKGAAAWATGAWCCCAAATNAATWAGAAAAGGATAAAGAKGATTATAAKGTGAWRTTGTWTTTAATTGCCCTAAGTCTGCTTACGTGGTAATTAATCACATTATAATCATCTTAATCTTTTCTAATTAATTAGGATAATATTTCATACATAACCAGTTGTCATGTTAATTTCTCAGGCAGATAACATCCCAGAAGGACAACGGGCATCAGCATTCGGAATTTTATCTGGTGTAGGTACCGGCGCCTCCTTTGTCTGTGGAACCTTGGCCACTCGTTTCCTCTCCACAACTTCCACATTCCGGGTTGCTACATACATTATTTGGAATTTATATTTGCTGCCTCTGTTATATTTTATTGCATGGTTTTGACATATATTTTGTGTTTCCTTTGCAGGTTGCTACATTATTCTCCATGATTGCAGCTGTGTACATGAGAGTTTTTCTCAAGGAGAGTTTACGCCCTGATGAGGATGGTTTAACGCAGCCAATTATCAAAGGAGGACCGGATGATAATCAAAATGAGAGGGCTGATTCTCCAAGGAAGATATGGGAATTCAAGAACATCCCATCAGTAAGGGATGTTACTTGTTTACTCAAGACTAGGTAATGCTTTCTAAAAGGTTTTGATTGATTGAATTAATTTAAAATTTAATCAGAAAACTTGAATCTAAACTTGTTTGCAGTGTTACCTTTTCGCAAGCGGCGGTTGTTGCATTTTTCAGCAGTCTAGCAGATGGAGGAATACAAGCTTCATTACTGGTATACCTTTTAATGCATAATTTTCTATATGAATGTACACCAAATTCTATTATAATTACTAACTTTTAAGATCTTATCTCATGTAGTACTTCTTAAAGGCTCAATTTCACTTCAACAAAAACCAGTTTGCTGATCTGATGCTAATTCTTGGGGTTGCAGGAATGGTTTCACAGGCATGTCTTATCTAACTCT |
| >Nucleotide_alignment_133396_(khinjuck)_consensus_sequence Alignment of 4 sequences: P.khinjuk_female.133396.PCR2.F.ab1, P.khinjuk_female.133396.PCR2.R.ab1 (reversed), P.khinjuk_male.133396.PCR2.F.ab1, P.khinjuk_male.133396.PCR2.R.ab1 (reversed) |
| GCCCAAAGTTCCCMCAAAACAAARGGAGGGCCCCGKACCCTCACACCCGATAAAAATTCCSAAAGMYGAWSMCCGCYCGCCCTTCCKGMAAGGWAAGYCCCCCCGAACAKKAAMCAGACMCACYAGYAACSRAKGAAAGAAWGAACCCAAAACAMYWAGGAAAGGRTTAARGAGATWRGWAAAGKKAGATGTTGTTTATAATTGCCCTMGMTCYTGCTTACGTGGTAATTAATCACATTATAATCATCTTAATCTTTTCTAATTAATTAGGATAATATTTCATACATAACTAGTTGTCATGTTAATTTCTCAGGCAGATAACATCCCAGAAGGACAACGGGCATCAGCATTCGGAATTTTATCTGGTGTAGGTACCGGCGCCTCCTTTGTCTGTGGAACCTTGGCCACTCGTTTCCTCTCCACAACTTCCACATTCCGGGTTGCTACATACATTATTTGGAATTTATATTTGCTGCMTCTGTTATATTTTATTGCATGGTTTTGACATATATTTTGTGTTTCCTTTGCAGGTTGCTACATTATTCTCCATGATTGCAGCTGTGTACATGAGAGTTTTTCTCAAGGAGAGTTTACGCCCTGATGAGGATGGTTTAACGCAGCCAATTATCAAAGGAGGACCGGATGATAATCAAAATGAGAGGGCTGATTCTCCAAGGAAGATATGGGAATTCAAGAACATCCCATCAGTAAGGGATGTTACTTGTTTACTCAAGACTAGGTAATGCTTTCTAAAAGGTTTTGATTGATTGAATTAATTTAAAATTTAATCAGAAAACTTGAATCTAAACTTGTTTGCAGCGTTACCTTTTCGCAAGCGGCGGTTGTTGCATTTTTCAGCAGTCTAGCAGATGGAGGAATACAAGCTTCATTACTGGTATACCTTTTAATGCATAATTTTCTATATGAATGTACACCAAATTCTATTATAATTACTAACTTTTAAGATCTTATCTCATGTAGTACTTCTTAAAGGCTCAATTTCACTTCAACAAAAACCAGTTTGCTGATCTGATGCTAATTCTTGGGGTTGCAGGAATGGTTTCACAGGCATGTCTTATCTAACTCTGTGTCCCCATGCAA |
| >Nucleotide_alignment_133396_(integerrima)__consensus_sequence Alignment of 4 sequences: P.integerrima_female.133396.PCR2.F.ab1, P.integerrima_female.133396.PCR2.R.ab1 (reversed), P.integerrima_male.133396.PCR2.F.ab1, P.integerrima_male.133396.PCR2.R.ab1 (reversed) |
| TCTAATTAATTAGGATAATATTTCATACATAACTAGTTGTCATGTTAATTTCTCAGGCAGATAACATCCCAGAAGGACAACGGGCATCAGCATTCGGAATTTTATCTGGTGTAGGTACCGGCGCCTCCTTTGTCTGTGGAACCTTGGCCACTCGTTTCCTCTCCACAACTTCCACATTCCGGGTTGCTACATACATTATTTGGAATTTATATTTGCTGCCTCTGTTATATTTTATTGCATGGTTTTGACATATATTTTGTGTTTCCTTTGCAGGTTGCTACATTATTCTCCACGATTGCAGCTGTGTACATGAGAGTTTTTCTCAAGGAGAGTTTACGCCCTGATGAGGATGGTTTAACGCAGCCAATTATCAAAGGAGGACCGGATGATAATCAAAATGAGAGGGCTGATTCTCCAAGGAAGATATGGGAATTCAAGAACATCCCATCAGTAAGGGATGTTACTTGTTTACTCAAGACTAGGTAATGCTTTCTAAAAGGTTTTGATTGATTGAATTAATTTAAAATTTAATCAGAAAACTTGAATCTAAACTTGTTTGCAGCGTTACCTTTTCGCAAGCGGCGGTTGTTGCATTTTTCAGCAGTCTAGCAGATGGAGGAATACAAGCTTCATTACTGGTATACCTTTTAATGCATAATTTTCTATATGAATGTACACCAAATTCTATTATAATTACTAACTTTTAAGATCTTATCTCATGTAGTACTTCTTAAAGGCTCAATTTCACTTCAACAAAAACCAGTTTGCTGATCTGATGCTAATTCTTGGGGTTGCAGGAATGGKTTCACAGGCATGTYTTAKCTAACTCKKTG |
| >Nucleotide_alignment_107303_(vera)_consensus_sequence Alignment of 2 sequences: P.vera_female.107303.PCR1_2.F.ab1, P.vera_male.107303.PCR1_2.F.ab1 |
| TTCGGTGCCGTTCTGAGCCGACWCCCACTTCGACGTGACTGCTCTCTCTCCTTCTCCTTATCCCTTTCCCTCTCTCTTTCACCGTCACGTTCCCGCTCTCTTCTGTCTTTGTCATGATCACGTTCCCGCTCTCTTCTGTCTTTGTCATGATCACGTTCCCGATCCCTATCTCTTTCCTTATCCCTCCCATTCCTCTCTTCTCTATCCCTATCCTTATCTCTCTCTCTATCCTTATGTTCCCGGCTACTCTTGTGTCTATCACTCACTCCATCTCTAGACCTTGAGCGATTACGGGATGAGCCCCTTTCTTTCCTTCTATCAYGATCACGTATATCATCTCTAGATTTGAAGGCCTTCAAGCGACGCGCATCATCATCATGATCTTCATCCTTCTCATCACTCCTATGCTTTGAACTCCTACTCCGTTCTCTCTCTTCAGACTTCCTAGCTCCACCACCACCATTTTCCTTTGCCTTCCCTTTCGAAGGCTCAGGATTCTCAACCGTTTTCTCCAAGTATTCGTACTCATCAAAATCCATTTTGCTCCTTTTTAACCAAACAACCCACCGAACACCTTGGCTGATAAACTACACCTACCACCGCAGAAACCTTAAAAAAAAATTAAAAAATAAATAAATTAACATTTCTCAAGCAAATATTAAAACAGCTCCTCTGTTTCCTAAAAATCAAACACATATAAAGAGTGAATTCCATTACTTCAACAAGTCTCTAGCCGCGTACATATAAAAATTAACTACTCACAGTGAAAGTGGACAAATTGTTAAGTTAAAACAAATGCATGTTCTGATTACAAATTTATAATATTCGATTCAAACAAAGAAATAAAAACAAGTAAAAACATCACCAGGCTTTGAGTTTCGTTTATAGTTTAATTACACTGACCTAGAGATTGTGATTGGCAGCAGAGAAAAAGAAGCTTAAAAACGAATCAAAACRACGRRRRATKTGAAGCTCAAATKTGTTTAAAASSNCAGGATTTAGRGGAAAAKCCGGGAYTCCTTGMTCTTTCTTCYCYYMRARRRMAAGTTCRGGAGWGYSMARAAAAAAAAWA |
| >Nucleotide_alignment_107303_(palaestina)_consensus_sequence Alignment of 2 sequences: P.palaestina_female.107303.PCR1_2.F.ab1, P.palaestina_male.107303.PCR1_2.F.ab1 |
| MCCCTTCGACGTGACTGCTCTCTCTCCTTCTCCTTATCCCTTTCCCTCTCTCTTTCACCGTCACGNNNTTCCCGCTCTCTTCTGTCTTTGTCATGATCACGTTCCCGCTCTCTTCTGTCTTTGTCATGATCACGTTCCCGATCCCTATCTCTTTCCTTATCCCTCCCATTCCTCTCTTCTCTATCCCTATCCTTATCTCTCTCTCTATCCTTATGTTCCCGGCTACTCTTGTGTCTATCACTCACTCCATCTCTAGACCTTGAGCGATTACGGGATGAGCCCCTTTCTTTCCTTCTATCACGATCACATATATCATCTCTAGATTTGAAGGCCTTCAAGCGACACGCATCATCATCATGATCTTCATCCTTCTCATCACTCCTATGCTTTGAACTCCTACTCCGTTCTCTCTCTTCAAACTTCCTAGCTCCACCACCACCATTTTCCTTTGCCTTCCCTTTCGAAGGCTCAGGATTCTCAACCGTTTTCTCCAAGTATTCGTACTCATCAAAATCCATTTTGCTCCTTTTTAACCAAACAACCCACCGAACACCTTGGCTGATAAACTACACCTACCACCGCAGAAACCTTAAAAAAAATAAAAAAAATMAATAAATTAACATTTCTCAAGCAAATATTAAAACAGCTCCTCTGTTTCCTAAAAATCAAACACATATAAAGAGCGAATTCCATTACTTCAACAAGTCTCTAGCCGCGTACATATAAAAATTAACTACTCACAGTGAAAGTGGACAAATTGTTAWGTTAAAACAAATGCATGTTCTGATTACGAATWTAATATTATTCGATTTCAGACKAAAAAAATARAAATCAAGTRAGAAACATCCACCAGGCTTTGGAGTTTCGGTTTTYGTTTTWATTWACACTGACCCGGAAGGTTGWGGATTGKGAGTCRGAGGAGSAAGAAGMSSTTAAGTAGAGARKMCKAAGCGRSTGGARTAARGTGAAACTTSYAAGGTKGGKTKAAGGTSGGGARA |
| >Nucleotide_alignment_107303_(integerrima)_consensus_sequence Alignment of 3 sequences: P.integerrima_female.107303.PCR1_2.F.ab1, P.integerrima_male.107303.PCR1_2.F.ab1, P.integerrima_male.107303.PCR1_2.R.ab1 (reversed) |
| CCMCCCTTCGACGTGNCTGCTCTCTCTCCTTCTCCTTATCCCTTTCCCTCTCTCTTTCACCGTCACGTTNNNGNNNNNNNCNGNNNNNNNNNNNNNNACATTCCCGCTCTCTTCTGTCTTTGTCATGATCACGTTCCCGCTCTCTTCTGTCTTTGTCATGATCACGTTCCCGATCCCTATCTCTTTCCTTATCCCTCCCATTCCTCTCTTCTCTATCCCTATCCTTATCTCTCTCTCTATCCTTATSTTCCCGGCTACTCTTGTGTCTRTCACTCACTCCATCTCTAGACCTTGAGCGATTAYGGGATGAGCCCCTTTCTTTCCTTCTATCACGATCACGTATATCATCTCTAGATTTGAAGGCCTTCAAGCGACGCGCATCATCATCATGATCTTCATCCTTCTCATCACTCCTATGCTTTGAACTCCTACTCCGTTCTCTCTCTTCAGACTTCCTAGCTCCACCACCACCATTTTCCTTTGCCTTCCCTTTCGAAGGCTCAGGATTCTCARCCGTTTTCTCCAAGTATTCGTACTCATCAAAATCCATTTTGCTCCTTTTTAACCAAACAACCCACCGAACACCTTGGCTGATAAACTACACCTACCACCGCAGAAACCTTAAAAAAAAATANAAAAAAAAATAAATTAGCASTTCTCAAGCAAATATTAAAACAGCTCCTCTGTTTCTTAAAAATCAAACACATATAAAGAGCGAATTCCATTACTTCAACAAGTCTCTAGCCGCGTACATATAAAAATTAACTACTCACAGTGAAAGTGGACAAATTGTTAAGTTAAAACAAATGCATGTTCTGATTACAAATTTATAATATTCGATTCAAACAAAGAAATAAAAACAAGTAAAAACATCACCAGGCTTTGAGTTTCGTTTATAGTTTAATTACACTGACCTAGAGATTGTGATTGGCAGCAGAGAAGAAGAAGCTTAAAAACGACTCWWAACGA |
| >Nucleotide_alignment_107303_(atlantica)_consensus_sequence Alignment of 4 sequences: P.atlanitca_female.107303.PCR1_2.F.ab1 (reversed), P.atlanitca_female.107303.PCR1_2.R.ab1, P.atlanitca_male.107303.PCR1_2.F.ab1 (reversed), P.atlanitca_male.107303.PCR1_2.R.ab1 |
| GRAAGSAGGAGTCCCCGGACTTCCTCTAAATCCTRGCGTTTTAAACACATTTGAGCTCATATTCTCCGTCGTTTTGAGTCGTTTTTAAGCTTCTTCTTCTCTGCTGCCAATCACAATCTCTAGGTCAGTGTAATTAAACTATAAACGAAACTCAAAGCCTGGTGATGTTTTTACTTGTTTTTATTTCTTTGTTTGAATCGAATATTATAAATTTGTAATCAGAACATGCATTTGTTTTAACTTAACAATTTGTCCACTTTCACTGTGAGTAGTTAATTTTTATATGTACGCGGCTAGAGACTTGTTGAAGTAATGGAATTCGCTCTTTATATGTGTTTGATTTTTAGGAAACAGAGGAGCTGTTTTAATATTTGCTTGAGAAATGCTAATTTATTTATTTTTTATTTTTTTTTTAAGGTTTCTGCGGTGGTAGGTGTAGTTTATCAGCCAAGGTGTTCGGTGGGTTGTTTGGTTAAAAAGGAGCAAAATGGATTTTGATGAGTACGAATACTTGGAGAAAACGGTTGAGAATCCTGAGCCTTCGAAAGGGAAGGCAAAGGAAAATGGTGGTGGTGGAGCTAGGAAGTCTGAAGAGAGAGAACGGAGTAGGAGTTCAAAGCATAGGAGTGATGAGAAGGATGAAGATCATGATGATGATGCGCGTCGCTTGAAGGCCTTCAAATCTAGAGATGATATACGTGATCGTGATAGAAGGAAAGAAAGGGGCTCATCCCATAATCGCTCAAGGTCTAGAGATGGAGTGAGTGACAGACACAAGAGTAGCCGGGAACATAAGGATAGAGAGAGAGATAAGGATAGGGATAGAGAAGAGAGGAATGGGAGGGATAAGGAAAGAGATAGGGATCGGGAACGTGATCATGACAAAGACAGAAGAGAGCGGGAACGTGATCATGACAAAGACAGAAGAGAGCGGGAATGTGATCATGACAAAGACAGAAGAGAGCGGGAACGTGACGGTGAAAGAGAGAGGGAAAGGGATAAGGAGAAGGAGAGAGAGCAGTCACGTCGAAGTGGGAGTCGG |
| >Nucleotide_alignment_91951_(vera)_consensus_sequence Alignment of 3 sequences: P.vera_female.91951.PCR1.F.ab1, P.vera_female.91951.PCR1.R.ab1 (reversed), P.vera_male.91951.PCR1.F.ab1 |
| GAGAAACCGAGTTCAAAATCTGAGATTAGTCCTGGTACAATGAGGAGGATTAAAAGGTTTGGCTTTTATATTTTTTACATCATGCTTGATGGTTTCTTTGAATAGTACTTCTTTGTGCATTTTTTATTCATTCCCATTTGTAGGTCCTAATTTTGTGTGTCAGTGAAATGTAGAATACAGGTGATTTTGGCTTCTAATATTTGTTACGAACCTATGTAGGGTTAAGAAGGTGACAAAGATGTCCAAGAAAGCCACTACTGGAATTCTTTTAGGGGTTGTCAAAGTGACCGGATTCCTCACAAATTCAATTGCCAACTCTAAAGCTGGCAAGAAATTCTTTAGCATTCTGCCTGGAGAAGTTGTCCTTGCTAGTTTGGACGGATTTGGTGAGTTGTTCTTTTCTTACTGCCTTGGCTTATATATCCTTAATCAGCTTTGAAGTATATTTTACTTATGTAGTTATAGTATGTGCTATATCTTGTAGCTTTAAGATTTGTTATGCTCTGTACTTGCTGCTCATGTTATTGTTCATTCTATGTACAGAGAAAGTTATTAATGCAGTTGAGGTTAGCGGTAAGAATGTTATGTCAACTACATCAGTAGTAACTACTGGGCTTGTTTCAGAGAGGTATATCTTTAATCTCAATCTAACAACATAATTGATGCTTCATTATGCCATCACCACTTTGATGTAACAATATAATTGATGCTTCATTGTTTCATAAACTTTTGAACTAATATATTTTCTGAACACGATTT |
| >Nucleotide_alignment_91951_(palaestina)_consensus_sequence Alignment of 4 sequences: P.palaestina_female.91951.PCR1.F.ab1 (reversed), P.palaestina_female.91951.PCR1.R.ab1, P.palaestina_male.91951.PCR1.F.ab1 (reversed), P.palaestina_male.91951.PCR1.R.ab1 |
| RGKAAATCGTGTTCAGAAAATATATTAGTTCAAAAGTTTATGAAACAATGAAGCATCAATTATATTGTTACATCAAAGTGGTGATGGCATAATGAAGCATCAATTATGTTGTTAGATTGAGATTAAAGATATACCTCTCTGAAACAAGCCCAGTAGTTACTACTGATGTAGTTGACATAACATTCTTACCGCTAACCTCAACTGCATTAATAACTTTCTCTGTACATAGAATGAACAATAACATGAGCAGCAAGTACAGAGCATAACAAATCTTAAAGCTACAAGATATAGCACATACTATAACTACATAAGTAAAATATACTTCAAAGCTGATTAAGGATATATAAGCCAAGGCAGTAAGAAAAGAACAACTCACCAAATCCGTCCAAACTAGCGAGGACAACTTCTCCAGGCAGAATGCTAAAGAATTTCTTGCCAGCTTTAGAGTTGGCAATTGAATTTGTGAGGAATCCGGTCACTTTGACAACCCCTAAAAGAATTCCAGTAGTGGCTTTCTTGGACATCTTTGTCACCTTCTTAACCCTACATAGGTTCGTAACAAATATTAGAAGCCAAAATCACCTGTATTCTACATTTCACTGACACACAAAATTAGGACCTACAAATGGGAATGAATAAAAAATGCACAAAGAAGTACTATTCAAAGAAACCATCAAGCATGATGTAAAAAATATAAAAGCCAAACCTTTTAATCCTCCTCATTGTACCAGGACTAATCTCAGATTTTGAACTCGGTTTCTC |
| >Nucleotide_alignment_91951_(mutica)__consensus_sequence Alignment of 4 sequences: P.mutica_female.91951.PCR1.F.ab1, P.mutica_female.91951.PCR1.R.ab1 (reversed), P.mutica_male.91951.PCR1.F.ab1, P.mutica_male.91951.PCR1.R.ab1 (reversed) |
| AAGGGAGAAACCGAGTTCAAAATCTGAGATTAGTCCTGCTACAATGAGGAGGATTAAAAGGTTTGGCTTTTATATTTTTTACATCATGCTTGATGGTTTCTTTGAATAGTTCTTCTTTGTGCATTTTTTATTCATTCCCATTTGTAGGCCCTAATTTTGTGTGTCAGTGAAATGTAGAATACAGGTGATTTTGGCTTCTAATATTTGTTACGAACCTATGTAGGGTTAAGAAGGTGACAAAGATGTCCAAGAAAGCCACTACTGGAATTCTTTTAGGGGTTGTCAAAGTGACCGGATTCCTCACAAATTCAATTGCCAACTCTAAAGCTGGCAAGAAATTCTTTAGCATTCTGCCTGGAGAAGTTGTCCTCGCTAGTTTGGACGGATTTGGTGAGTTGTTCTTTTCTTACTGCCTTGGCTTATATATCCTTAATCAGCTTTGAAGTATATTTTACTTATGCAGTTATAGTATGTGCTATATCGTGTAGCGTTAAGAGTTGTTGTGCTCTGTACTTGCTGCTCATGTTATTGTTCATTCTATGTACAGAGAAAGTTATTAATGCAGTTGAGGTTAGCGGTAAGAATGTTATGTCAACTACATCAGTAGTAACAACTGGGCTTGTTTCAGAGAGGTATATCTTTTAATCTCAATCTAACAACATAATTGATGCTTCGTTATGCCATCACCACTTTGATGTAACAATATAATTGATGCTTCATTGTTTCATAAACTTTTGAACTAATATAATTTCTGAACACGATTTC |
| >Nucleotide_alignment_91951_(khinjuk)_consensus_sequence Alignment of 4 sequences: P.khinjuk_female.91951.PCR1.F.ab1, P.khinjuk_female.91951.PCR1.R.ab1 (reversed), P.khinjuk_male.91951.PCR1.F.ab1, P.khinjuk_male.91951.PCR1.R.ab1 (reversed) |
| GAACCGAGTTCAAAATCTGAGATTAGTCCTGGTACAATGAGGAGGATTAAAAGGTTTGGCTTTTATATTTTTTACATCATGCTTGATGGTTTCTTTGAATAGTACTTCTTTGTGCATTTTTTATTCATTCCCATTTGTAGGTCCTAATTTTGTGTGTCAGTGAAATGTAGAATACAGGTGATTTTGGCTTCTAATATTTGTTACGAACCTATGTAGGGTTAAGAAGGTGACAAAGATGTCCAAGAAAGCCACTACTGGAATTCTTTTAGGGGTTGTCAAAGTGACCGGATTCCTCACAAATTCAATTGCCAACTCTAAAGCTGGCAAGAAATTCTTTAGCATTCTGCCTGGAGAAGTTGTCCTCGCTAGTTTGGACGGATTTGGTGAGTTGTTCTTTTCTTACTGCCTTGGCTTATATATCCTTAATCAGCTTTGAAGTATATTTTACTTATGTAGTTATAGTATGTGCTATATCTTGTAGCTTTAAGATTTGTTATGCTCTGTACTTGCTGCTCATGTTATTGTTCATTCTATGTACAGAGAAAGTTATTAATGCAGTTGAGGTTAGCGGTAAGAATGTTATGTCAACTACATCAGTAGTAACTACTGGGCTTGTTTCAGAGAGGTATATCTTTAATCTCAATCTAACAACATAATTGATGCTTCATTATGCCATCACCACTTTGATGTAACAATATAATTGATGCTTCATTGTTTCATAAACTTTTGAACTAATATATTTTCTGAACACGATTTMCC |
| >Nucleotide_alignment_91951_(integerrima)_consensus_sequence Alignment of 4 sequences: P.integerrima_female.91951.PCR1.F.ab1 (reversed), P.integerrima_female.91951.PCR1.R.ab1, P.integerrima_male.91951.PCR1.F.ab1 (reversed), P.integerrima_male.91951.PCR1.R.ab1 |
| GGKAAATCGTGTTCAGAAAATATATTAGTTCAAAASTTTCTGAAACAATGAAGCATCAATTATATTGTTACATCAAAGTGGTGATGGCATAATGAAGCATCAATTATGTTGTTAGATTGAGATTAAAGATATACCTCTCTGAAACAAGCCCAGTTGTTACTACTGATGTAGTTGACATAACATTCTTACCGCTAGCCTCAACTGCATTAATAACTTTCTCTGTACATAGAATGAACAATAACATGAGCAGCAAGTACAGAGCATAACAAATCTTAAAGCTAGACGATATAGCACATACTATAACTACATAAGTAAAATATACTTCAAAGCTGATTAAGGATAYATAAGCCAAGGCAGTAAGAAAAGAACAACTCACCGAATCCGTCCAAACTAGCGAGGACAACTTCTCCGGGCAGAATGCTAAAGAATTTCTTGCCAGCTTTAGAGTTGGCAATTGAATTTGTGAGGAATCCGGTCAYTTTGACAACCCCTAAAAGAATTCCAGTAGTGGCTTTCTTGGACATCTTTGTCACCTTCTTAACCCTACATAGGTCCGTAACAAATATTAGAAGCCAAAATCAGCTGTATTCTAYATTTCACTGACACACAAAATTAGGACCTACAAATGGGAATGAATAAAAAATGCACAAAGAAGTACTATTCAAAGAAACCATCAAGCATGATGTAAAAAATATAAAAGCCAAACCTTTTAATCCTCCTCATTGTACCAGGACTAATCTCAGATTTTGAACTCGGTTTCATC |
| >Nucleotide_alignment_91951_(atlantica)__consensus_sequence Alignment of 4 sequences: P.atlanitca_female.91951.PCR1.F.ab1, P.atlanitca_female.91951.PCR1.R.ab1 (reversed), P.atlanitca_male.91951.PCR1.F.ab1, P.atlanitca_male.91951.PCR1.R.ab1 (reversed) |
| GAACCGAGTTCAAAATCTGAGATTAGTCCTGCTACAGTGAGGAGGATTAAAAGGTTTGGCTTTTATATTTTTTACATCATGCTTGATGGTTTCTTTGAATAGTTCTTCTTTGTGCATTTTTTATTCATTCCCATTTGTAGGTCCTAATTTTGTGTGTCAGTGAAATGTAGAATACAGGTGATTTTGGCTTCTAATATTTGTTACGAACCTATGTAGGGTTAAGAAGGTGACAAAGATGTCCAAGAAAGCCACTACTGGAATTCTTTTAGGGGTTGTCAAAGTGACCGGATTCCTCACAAATTCAATTGCCAACTCTAAAGCTGGCAAGAAATTCTTTAGCATTCTGCCTGGAGAAGTTGTCCTCGCTAGTTTGGACGGATTYGGTGAGTTGTTCTTTTCTTACTGCCTTGGCTTATATATCCTTAATCAGCTTTGAAGTATATTTTACTTATGYAGTTATAGTATGTGCTATATCGTSTAGCKTTAAGAKTTGTTRTGCTCTGTACTTGCTGCTCATGTTATTGTTCATTCTATGTACAGAGAAAGTTATTAATGCAGTTGAGGYTAGCGGTAAGAATGTTATGTCAACTACATCAGTAGTAACAACTGGGCTTGTTTCAGAGAGGTATATCNTTTAATCTCAATCTAACAACATAATTGATGCTTCRTTATGCCATCACCACTTTGATGTAACAATATAATTGATGCTTCATTGTTTCAGAAACTTTTGAACTAATATAWTTTCTGAACACGATTTYC |
